# Supplementary material for: Understanding Differential Stress and Mental Health Reactions to COVID-19-Related Events
Source: MDPI journal article supplement (doi:10.3390/ijerph20105819), 2023-05-13
Supplement: s1 [file s1]

## Supplementary Materials

**Table S1.** Characteristics of the sample stratified by the COVID-19 stressor types

| Sample demographics characteristic | Own Infection Experiences |               | Experiences not COVID-19 Infection |               | Loved Ones Serious Experiences |               | Loved Ones' Positives and quarantine |               |
|------------------------------------|---------------------------|---------------|------------------------------------|---------------|--------------------------------|---------------|--------------------------------------|---------------|
|                                    | Yes                       | No            | Yes                                | No            | Yes                            | No            | Yes                                  | No            |
| Female                             | 164 (61.2%)               | 272 (68.9%)   | 223 (64.8%)                        | 213 (66.8%)   | 105 (64.8%)                    | 331 (66.1%)   | 337 (64.1%)                          | 99 (72.3%)    |
| Age (mean [ <i>SD</i> ])           | 45.76 (18.46)             | 48.09 (21.35) | 42.84 (18.66)                      | 51.77 (20.90) | 51.16 (19.93)                  | 45.84 (20.21) | 46.89 (20.60)                        | 48.16 (18.90) |
| Marital status                     |                           |               |                                    |               |                                |               |                                      |               |
| Single                             | 98 (36.4%)                | 157 (39.7%)   | 148 (42.9%)                        | 107 (33.5%)   | 48 (29.3%)                     | 207 (41.4%)   | 210 (39.8%)                          | 45 (32.8%)    |
| Married/ in a civil union          | 140 (52%)                 | 166 (42%)     | 155 (44.9%)                        | 151 (47.3%)   | 85 (51.8%)                     | 221 (44.2%)   | 239 (45.4%)                          | 67 (48.9%)    |
| Divorced                           | 20 (7.4%)                 | 46 (11.6%)    | 32 (9.3%)                          | 34 (10.7%)    | 20 (12.2%)                     | 46 (9.2%)     | 48 (9.1%)                            | 18 (13.1%)    |
| Widowed                            | 11 (4.1%)                 | 26 (6.6%)     | 10 (2.9%)                          | 27 (8.5%)     | 11 (6.7%)                      | 26 (5.2%)     | 30 (5.7%)                            | 7 (5.1%)      |
| Level of education                 |                           |               |                                    |               |                                |               |                                      |               |
| Four years or less                 | 14 (5.2%)                 | 13 (3.3%)     | 10 (2.9%)                          | 17 (5.3%)     | 11 (6.7%)                      | 16 (3.2%)     | 22 (4.2%)                            | 5 (3.6%)      |
| Six years                          | 5 (1.9%)                  | 4 (1%)        | 5 (1.4%)                           | 4 (1.2%)      | 5 (3%)                         | 4 (0.8%)      | 9 (1.7%)                             | 0             |
| Nine years                         | 30 (11.2%)                | 24 (6%)       | 27 (7.8%)                          | 27 (8.4%)     | 12 (7.3%)                      | 42 (8.4%)     | 40 (7.6%)                            | 14 (10.2%)    |
| Twelve years                       | 78 (29%)                  | 115 (29%)     | 106 (30.7%)                        | 87 (27.1%)    | 52 (31.7%)                     | 141 (28.1%)   | 153 (28.9%)                          | 40 (29.2%)    |
| Bachelor's degree                  | 94 (34.9%)                | 167 (42.1%)   | 129 (37.4%)                        | 132 (41.1%)   | 58 (35.4%)                     | 203 (40.4%)   | 198 (37.4%)                          | 63 (46%)      |
| Master's degree                    | 41 (15.2%)                | 68 (17.1%)    | 62 (18%)                           | 47 (14.6%)    | 20 (12.2%)                     | 89 (17.7%)    | 94 (17.8%)                           | 15 (10.9%)    |
| Ph.D. or superior                  | 7 (2.6%)                  | 6 (1.5%)      | 6 (1.7%)                           | 7 (2.2%)      | 6 (3.7%)                       | 7 (1.4%)      | 13 (2.5%)                            | 0             |
| Professional status                |                           |               |                                    |               |                                |               |                                      |               |
| Full-time employee                 | 148 (55%)                 | 134 (33.8%)   | 158 (45.8%)                        | 124 (38.6%)   | 68 (41.5%)                     | 214 (42.6%)   | 218 (41.2%)                          | 64 (46.7%)    |
| Part-time worker                   | 13 (4.8%)                 | 18 (4.5%)     | 17 (4.9%)                          | 14 (4.4%)     | 7 (4.3%)                       | 24 (4.8%)     | 26 (4.9%)                            | 5 (3.6%)      |
| Unemployed                         | 20 (7.4%)                 | 28 (7.1%)     | 36 (10.4%)                         | 12 (3.7%)     | 11 (6.7%)                      | 37 (7.4%)     | 37 (7%)                              | 11 (8%)       |
| Student                            | 28 (10.4%)                | 68 (17.1%)    | 65 (18.8%)                         | 31 (9.7%)     | 20 (12.2%)                     | 76 (15.1%)    | 79 (14.9%)                           | 17 (12.4%)    |
| Retired                            | 60 (22.3%)                | 149 (37.5%)   | 69 (20%)                           | 140 (43.6%)   | 58 (35.4%)                     | 151 (30.1%)   | 169 (31.9%)                          | 40 (29.2%)    |
| Mental health disorders diagnosed  | 34 (13%)                  | 41 (10.8%)    | 36 (10.9%)                         | 39 (12.5%)    | 18 (11.3%)                     | 57 (11.8%)    | 59 (11.5%)                           | 16 (12.3%)    |
| Belonging risk group               | 113 (42%)                 | 158 (39.8%)   | 130 (37.7%)                        | 141 (43.9%)   | 79 (48.2%)                     | 192 (38.2%)   | 217 (41%)                            | 54 (39.4%)    |

**Table S2.** Characteristics of the sample stratified by the number of experienced COVID-19 stressors and stress responses to the most stressful experienced COVID-19-related event

| Variable                  | Number of experienced COVID-19 stressors | Stress responses to the most stressful COVID-19-related event |
|---------------------------|------------------------------------------|---------------------------------------------------------------|
| Sex                       |                                          |                                                               |
| Male                      | 3.16 (2.13)                              | 49.50 (16.82)                                                 |
| Female                    | 2.79 (1.87)                              | 53.77 (17.43)                                                 |
| Age                       | $r = -0.06$                              | $r = -0.05$                                                   |
| Marital status            |                                          |                                                               |
| Single                    | 2.85 (1.79)                              | 51.66 (16.60)                                                 |
| Married/ in a civil union | 3.10 (2.07)                              | 52.22 (17.23)                                                 |
| Divorced                  | 2.61 (2.07)                              | 56.05 (18.54)                                                 |
| Widowed                   | 2.57 (2.05)                              | 50.85 (21.33)                                                 |
| Level of education        |                                          |                                                               |
| Four years or less        | 3.63 (2.00)                              | 63.12 (14.30)                                                 |
| Six years                 | 4.67 (2.55)                              | 65.00 (18.29)                                                 |
| Nine years                | 3.50 (2.68)                              | 61.62 (18.15)                                                 |
| Twelve years              | 3.05 (2.24)                              | 54.05 (17.45)                                                 |
| Bachelor's degree         | 2.62 (1.61)                              | 51.12 (16.46)                                                 |
| Master's degree           | 2.71 (1.60)                              | 45.32 (16.21)                                                 |
| PhD or superior           | 3.62 (1.80)                              | 48.69 (13.78)                                                 |
| Professional status       |                                          |                                                               |
| Full-time employee        | 3.17 (2.06)                              | 53.30 (17.17)                                                 |
| Part-time worker          | 3.45 (2.03)                              | 54.87 (16.18)                                                 |
| Unemployed                | 3.48 (2.25)                              | 59.36 (18.10)                                                 |
| Student                   | 2.84 (1.57)                              | 51.67 (15.65)                                                 |
| Retired                   | 2.41 (1.83)                              | 48.66 (17.71)                                                 |
| Mental health disorders   |                                          |                                                               |
| Yes                       | 3.12 (2.16)                              | 60.89 (19.20)                                                 |
| No                        | 2.91 (1.95)                              | 51.21 (16.81)                                                 |
| Risk group                |                                          |                                                               |
| Yes                       | 3.16 (2.22)                              | 54.00 (18.63)                                                 |
| No                        | 2.76 (1.77)                              | 51.20 (16.34)                                                 |
